# Supplementary material for: Genome-wide identification and characterization of TIFY family genes in Moso Bamboo (Phyllostachys edulis) and expression profiling analysis under dehydration and cold stresses
Source: PeerJ journal article supplement (doi:10.7717/peerj.2620), 2016-10-27

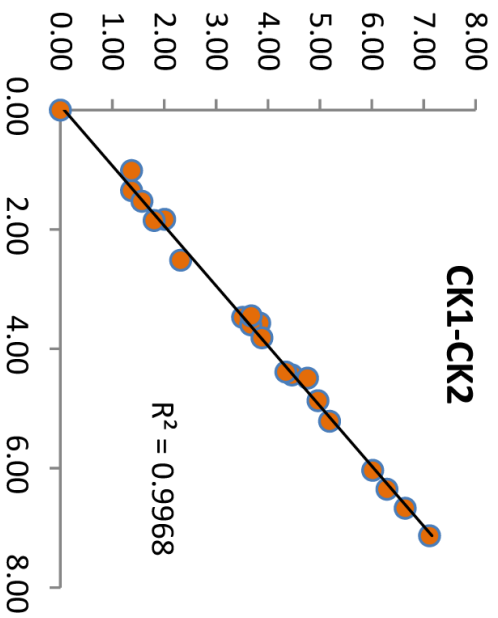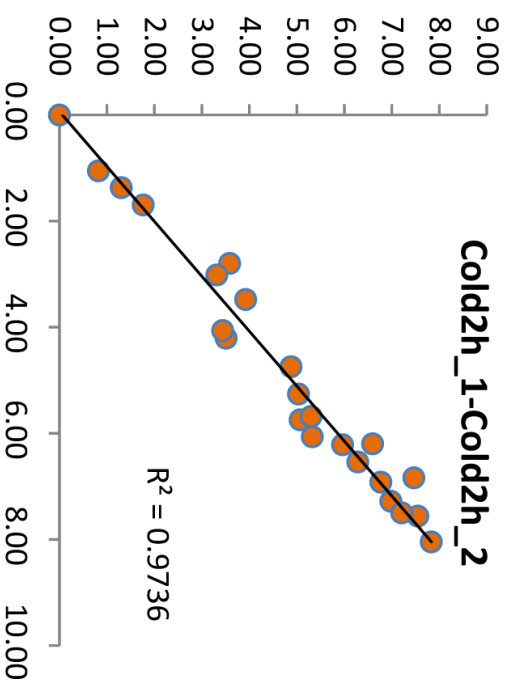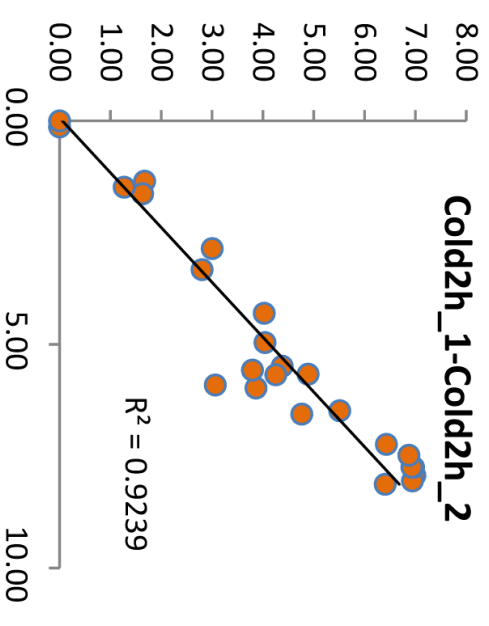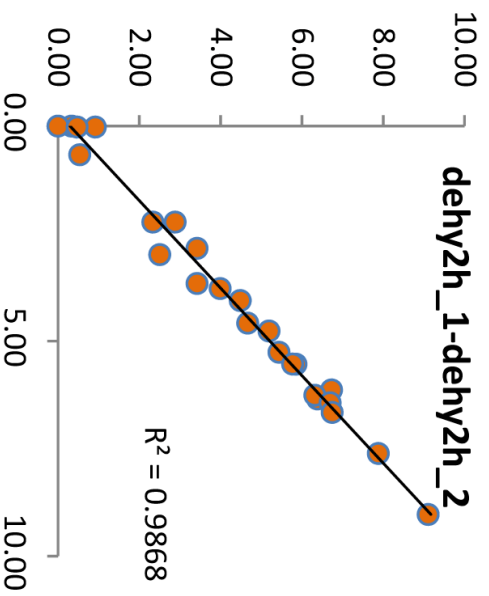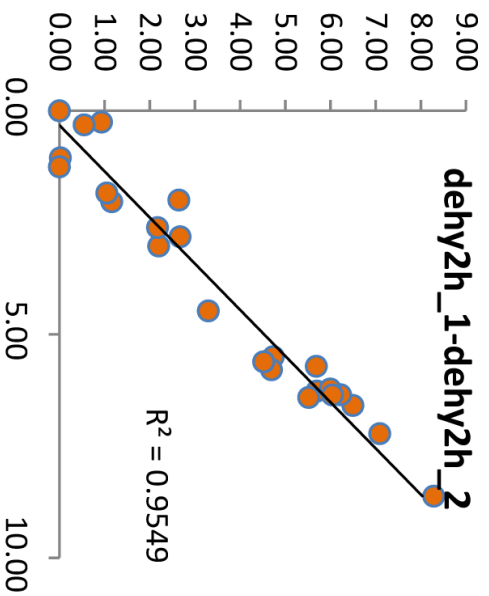

Supplement: figure_S4.pdf [file figure_S4.pdf]
