# Supplementary material for: Genome-wide identification and characterization of TIFY family genes in Moso Bamboo (Phyllostachys edulis) and expression profiling analysis under dehydration and cold stresses
Source: PubMed Central journal article supplement (PMC5088587; doi:10.7717/peerj.2620), 2016-10-27

LOC\_Os06g48534.1\_OsTIFY2b

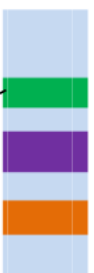

Bradi1g33980\_BdZML4

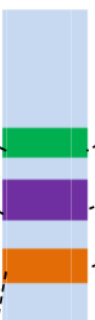

PH01000878G0620

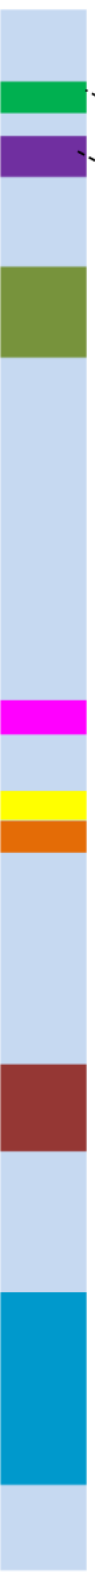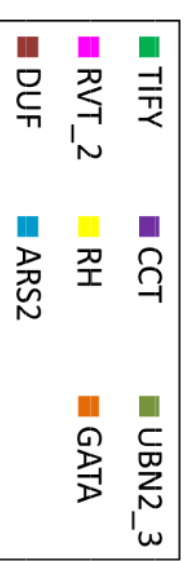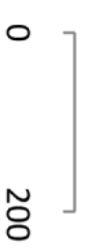

Supplement: peerj-04-2620-s002.pdf [file peerj-04-2620-s002.pdf]
