# Supplementary material for: Genome-wide identification and characterization of TIFY family genes in Moso Bamboo (Phyllostachys edulis) and expression profiling analysis under dehydration and cold stresses
Source: PubMed Central journal article supplement (PMC5088587; doi:10.7717/peerj.2620), 2016-10-27
Supplement: peerj-04-2620-s005.pdf [file peerj-04-2620-s005.pdf]

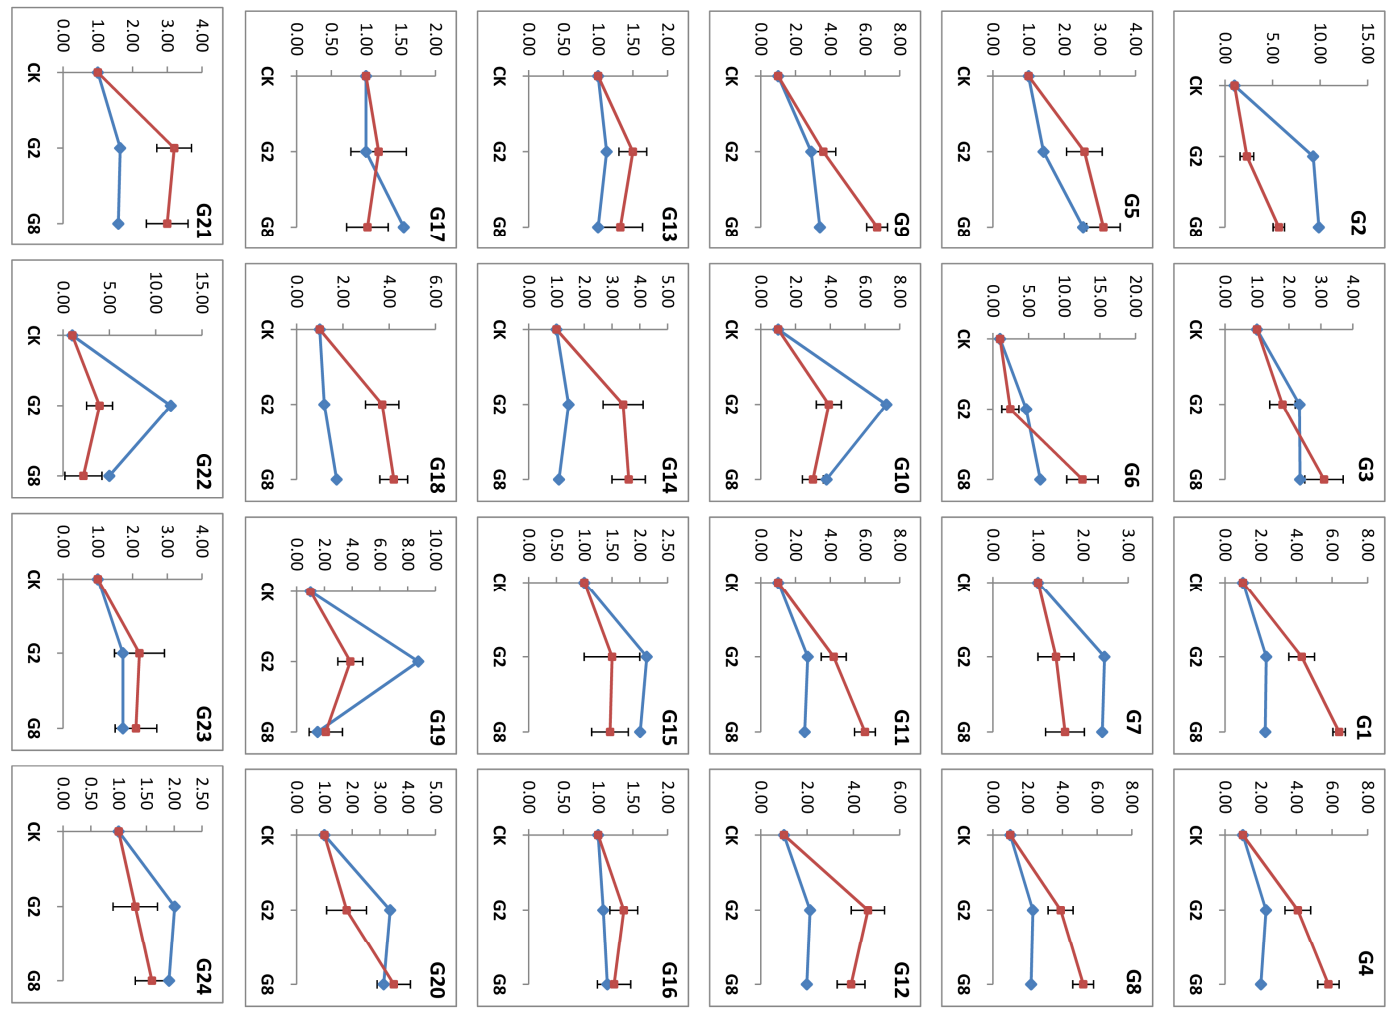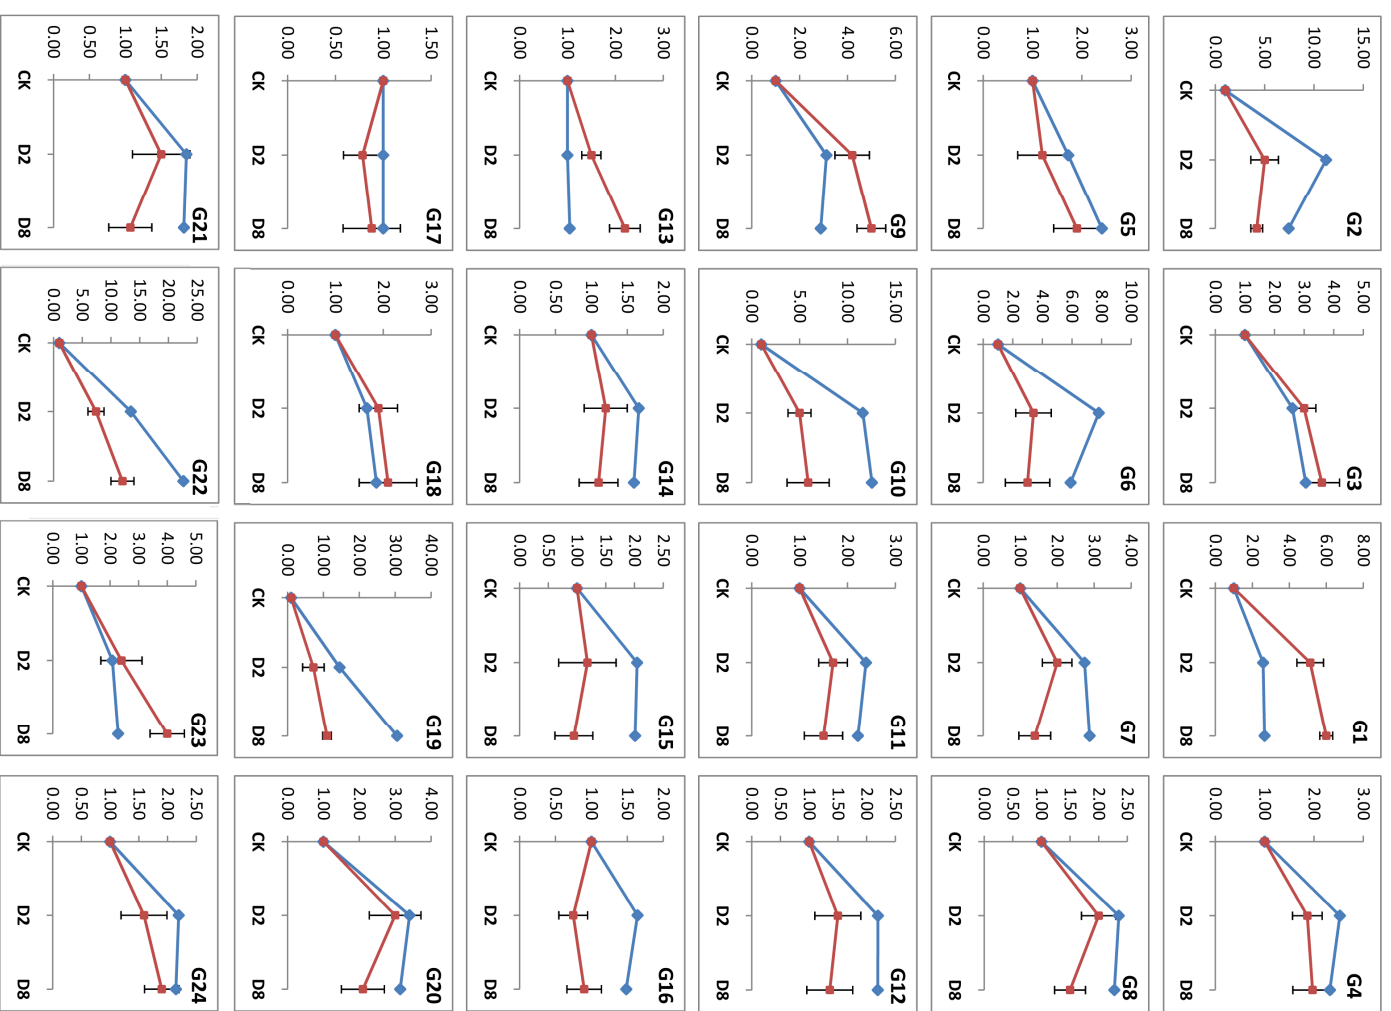

—●— RNA-seq —■— qPCR
