# Supplementary material for: Genome-wide identification and characterization of TIFY family genes in Moso Bamboo (Phyllostachys edulis) and expression profiling analysis under dehydration and cold stresses
Source: PubMed Central journal article supplement (PMC5088587; doi:10.7717/peerj.2620), 2016-10-27
Supplement: peerj-04-2620-s006.pdf [file peerj-04-2620-s006.pdf]

**Table S1 Primers used for qPCR analyses.**

| Gene ID                |            |                     | Sequence (5'->3')     | Length | Tm    |
|------------------------|------------|---------------------|-----------------------|--------|-------|
| <b>PH0100008G2960</b>  | <b>G1</b>  | Forward primer      | AGGCGGAACCGTCAGATTAC  | 20     | 59.82 |
|                        |            | Reverse primer      | GAGAAAGTGGTCAAACACGGC | 20     | 59.41 |
|                        |            | Product length (bp) | 142                   |        |       |
| <b>PH01000038G0470</b> | <b>G2</b>  | Forward primer      | TGGGCAGAGTGCTAAGAATGG | 21     | 60.07 |
|                        |            | Reverse primer      | TCACGATCGGGGCGATGC    | 18     | 62.59 |
|                        |            | Product length (bp) | 113                   |        |       |
| <b>PH01000038G0510</b> | <b>G3</b>  | Forward primer      | CGTCAAGGCGGAGCAGAAGA  | 20     | 62.49 |
|                        |            | Reverse primer      | CCCGCCGTAGAAGATGGTCAG | 21     | 62.55 |
|                        |            | Product length (bp) | 148                   |        |       |
| <b>PH01000052G0540</b> | <b>G4</b>  | Forward primer      | GGAGAAGAAGGGTGGGCTAC  | 20     | 59.46 |
|                        |            | Reverse primer      | CGAGCCCTGACAACAAGTTC  | 20     | 59.13 |
|                        |            | Product length (bp) | 110                   |        |       |
| <b>PH01000114G0660</b> | <b>G5</b>  | Forward primer      | GGGAGTTGTCCCGATGGA    | 19     | 60.99 |
|                        |            | Reverse primer      | AACGACAGTGTGAGCGTGTT  | 20     | 60.46 |
|                        |            | Product length (bp) | 139                   |        |       |
| <b>PH01000115G0020</b> | <b>G6</b>  | Forward primer      | TTGCTGCGGCAGTACATGAAG | 21     | 61.54 |
|                        |            | Reverse primer      | GCCGCACCAACAACATCGG   | 19     | 62.61 |
|                        |            | Product length (bp) | 104                   |        |       |
| <b>PH01000115G0040</b> | <b>G7</b>  | Forward primer      | GGCAAGAGCCGGAGGTTC    | 18     | 60.44 |
|                        |            | Reverse primer      | CGCGGCCGACATCTTCT     | 17     | 59.85 |
|                        |            | Product length (bp) | 78                    |        |       |
| <b>PH01000158G0210</b> | <b>G8</b>  | Forward primer      | GGACGAACAGCTTCGCCAT   | 19     | 60.74 |
|                        |            | Reverse primer      | ATCCAAACTCCGCCACAGAT  | 20     | 59.38 |
|                        |            | Product length (bp) | 113                   |        |       |
| <b>PH01000213G1380</b> | <b>G9</b>  | Forward primer      | GTGGTGAGCCTCCTGCC     | 17     | 59.68 |
|                        |            | Reverse primer      | CCGGCAGTTCTTGGGATGAC  | 20     | 61.03 |
|                        |            | Product length (bp) | 103                   |        |       |
| <b>PH01000213G1410</b> | <b>G10</b> | Forward primer      | AAGCCGGTGCCTCAAGG     | 17     | 60.34 |
|                        |            | Reverse primer      | CTTCTCTGACGTGGGGCAC   | 19     | 60.37 |
|                        |            | Product length (bp) | 122                   |        |       |
| <b>PH01000310G0500</b> | <b>G11</b> | Forward primer      | CTTCGGCGAAAACCGGGG    | 18     | 61.43 |
|                        |            | Reverse primer      | GGCGTCCTCGGAGCATC     | 17     | 59.93 |
|                        |            | Product length (bp) | 142                   |        |       |
| <b>PH01000360G1030</b> | <b>G12</b> | Forward primer      | ATGGAGATGTCTGCGTCCG   | 19     | 59.56 |
|                        |            | Reverse primer      | CCTCACCTTTGATCCCGAGG  | 20     | 59.82 |
|                        |            | Product length (bp) | 133                   |        |       |
| <b>PH01000361G0580</b> | <b>G13</b> | Forward primer      | AGGCAAGGGCGATCATATCC  | 20     | 59.67 |
|                        |            | Reverse primer      | GGTGGCGATCGTCATCTCTA  | 20     | 59.05 |
|                        |            | Product length (bp) | 75                    |        |       |
| <b>PH01000549G0400</b> | <b>G14</b> | Forward primer      | ATCATCTTCTACGACGGGCG  | 20     | 59.69 |
|                        |            | Reverse primer      | CATACCTTCCTCGCCTTCCC  | 20     | 59.89 |
|                        |            | Product length (bp) | 119                   |        |       |
| <b>PH01000597G0660</b> | <b>G15</b> | Forward primer      | GGAGGAGAAGACCCAGGAGT  | 20     | 59.96 |
|                        |            | Reverse primer      | AGCTGTGCAGGATTAGCTGG  | 20     | 60.11 |
|                        |            | Product length (bp) | 117                   |        |       |
| <b>PH01000750G0690</b> | <b>G16</b> | Forward primer      | GATGGCCACGATCCCCTG    | 18     | 59.89 |
|                        |            | Reverse primer      | GTCGAAGACGTAGACCTCGC  | 20     | 60.25 |
|                        |            | Product length (bp) | 132                   |        |       |
| <b>PH01000836G0660</b> | <b>G17</b> | Forward primer      | GTCGGGTGGAACACGCTC    | 18     | 60.8  |
|                        |            | Reverse primer      | TTTCCCGGAACCTCATCAGC  | 20     | 60.04 |
|                        |            | Product length (bp) | 121                   |        |       |

|                        |            |                     |                      |    |       |
|------------------------|------------|---------------------|----------------------|----|-------|
| <b>PH01000878G0620</b> | <b>G18</b> | Forward primer      | GTGAGCAGGATGGCGTCG   | 18 | 60.89 |
|                        |            | Reverse primer      | GAGCTGGTTGGACGAGACTG | 20 | 60.39 |
|                        |            | Product length (bp) | 149                  |    |       |
| <b>PH01001078G0280</b> | <b>G19</b> | Forward primer      | ACGACCAGCAGCAGGTTTG  | 19 | 60.89 |
|                        |            | Reverse primer      | GATGCATCATGTGGTCGGC  | 19 | 59.35 |
|                        |            | Product length (bp) | 76                   |    |       |
| <b>PH01001078G0420</b> | <b>G20</b> | Forward primer      | TACATGCGGGAGCACCAAC  | 19 | 60.38 |
|                        |            | Reverse primer      | GAAGAGCTGCATGGTCCTGG | 20 | 60.75 |
|                        |            | Product length (bp) | 120                  |    |       |
| <b>PH01001584G0350</b> | <b>G21</b> | Forward primer      | CGCTGGCCGAGGAGC      | 15 | 59.84 |
|                        |            | Reverse primer      | CCCTGGAACAGCAGAGTCAG | 20 | 60.04 |
|                        |            | Product length (bp) | 82                   |    |       |
| <b>PH01001852G0020</b> | <b>G22</b> | Forward primer      | CTACAGACTCCACCACCCGA | 20 | 60.61 |
|                        |            | Reverse primer      | GCGTTGGGTTCTTGTACGAC | 20 | 59.49 |
|                        |            | Product length (bp) | 142                  |    |       |
| <b>PH01002950G0020</b> | <b>G23</b> | Forward primer      | CTCCCGTTCCCCCAATTCTC | 20 | 60.11 |
|                        |            | Reverse primer      | TGTCAGCGCCGAAGTATCTC | 20 | 59.9  |
|                        |            | Product length (bp) | 91                   |    |       |
| <b>PH01144128G0010</b> | <b>G24</b> | Forward primer      | ATTCGATAACGTCCCGGTGG | 20 | 59.9  |
|                        |            | Reverse primer      | CGAATCTGATTTGCGGGCTG | 20 | 59.97 |
|                        |            | Product length (bp) | 100                  |    |       |
| <b>EF1</b>             |            | Forward primer      | GATGATTCCCACCAAGCCCA | 20 | 60.03 |
|                        |            | Reverse primer      | TGGGTCTTCTTCTCAACGC  | 20 | 59.97 |
|                        |            | Product length (bp) | 130                  |    |       |

---
