# Supplementary material for: Genome-wide identification and characterization of TIFY family genes in Moso Bamboo (Phyllostachys edulis) and expression profiling analysis under dehydration and cold stresses
Source: PubMed Central journal article supplement (PMC5088587; doi:10.7717/peerj.2620), 2016-10-27
Supplement: peerj-04-2620-s007.pdf [file peerj-04-2620-s007.pdf]

**Table S2 Comparison of Pfam analyses of two re-predicted gene models.**

|                        |                               | Family  | Description                          | Entry type | Clan   | Start | End     | Bit score | E-value  |
|------------------------|-------------------------------|---------|--------------------------------------|------------|--------|-------|---------|-----------|----------|
| <b>PH01000361G0580</b> | Original                      | tify    | tify domain                          | Domain     | n/a    | 58    | 79      | 21.5      | 9.60E-05 |
|                        | Re-predicted                  | tify    | tify domain                          | Domain     | n/a    | 58    | 88      | 37.3      | 1.1E-09  |
|                        |                               | CCT_2   | Divergent CCT motif                  | Motif      | CL0281 | 169   | 193     | 29.6      | 4.1E-07  |
| <b>PH01000878G0620</b> | Original                      | tify    | tify domain                          | Domain     | n/a    | 80    | 113     | 49.3      | 1.9E-13  |
|                        |                               | CCT     | CCT motif                            | Motif      | CL0281 | 139   | 171     | 42.1      | 5.8E-11  |
|                        | Re-predicted                  | tify    | tify domain                          | Domain     | n/a    | 80    | 113     | 45.5      | 3.1E-12  |
|                        |                               | CCT     | CCT motif                            | Motif      | CL0281 | 139   | 182     | 54.5      | 7.9E-15  |
|                        |                               | GATA    | GATA zinc finger                     | Domain     | CL0167 | 890   | 925     | 45.9      | 2.7E-12  |
|                        |                               | DUF3546 | Domain of unknown function (DUF3546) | Family     | n/a    | 1159  | 1261    | 51.6      | 8.5E-14  |
| ARS2                   | Arsenite-resistance protein 2 | Family  | n/a                                  | 1408       | 1620   | 115.5 | 3.4E-33 |           |          |
