# Supplementary material for: Genome-wide identification and characterization of TIFY family genes in Moso Bamboo (Phyllostachys edulis) and expression profiling analysis under dehydration and cold stresses
Source: PubMed Central journal article supplement (PMC5088587; doi:10.7717/peerj.2620), 2016-10-27
Supplement: peerj-04-2620-s008.pdf [file peerj-04-2620-s008.pdf]

**Table S3 Detailed protein annotation of re-predicted PH01000878G0620 by Pfam and NCBI.**

| Name            | Accession  | Description                                                                                                                                    | Interval |      | E-value  |
|-----------------|------------|------------------------------------------------------------------------------------------------------------------------------------------------|----------|------|----------|
| TIFY            | PF06200.10 | TIFY domain                                                                                                                                    | 80       | 114  | 3.1E-12  |
| CCT             | PF06203.10 | CCT motif                                                                                                                                      | 139      | 183  | 2.18E-18 |
| UBN2_3          | pfam14244  | gag-polypeptide of LTR copia-type                                                                                                              | 282      | 381  | 7.74E-06 |
| RVT_2           | pfam07727  | Reverse transcriptase (RNA-dependent DNA polymerase);<br>It is usually indicative of a mobile element such as a retrotransposon or retrovirus. | 758      | 795  | 1.69E-03 |
| RNase_HI_RT_Ty1 | cd09272    | Ty1/Copia family of RNase HI in long-term repeat retroelements                                                                                 | 857      | 888  | 4.05E-03 |
| ZnF_GATA        | PF00320.23 | GATA zinc finger                                                                                                                               | 889      | 924  | 2.70E-12 |
| DUF3546         | pfam12066  | Domain of unknown function (DUF3546)                                                                                                           | 1157     | 1253 | 4.34E-32 |
| ARS2            | pfam07727  | Arsenite-resistance protein 2                                                                                                                  | 1408     | 1620 | 3.40E-33 |
