# Supplementary material for: Genome-wide identification and characterization of TIFY family genes in Moso Bamboo (Phyllostachys edulis) and expression profiling analysis under dehydration and cold stresses
Source: PubMed Central journal article supplement (PMC5088587; doi:10.7717/peerj.2620), 2016-10-27
Supplement: peerj-04-2620-s009.pdf [file peerj-04-2620-s009.pdf]

**Table S4 Paralogous and orthologous relationship among PeTIFY, OsTIFY, and, BdTIFY**

| Paralogues      |                 | Orthologues      |              |
|-----------------|-----------------|------------------|--------------|
|                 |                 | OsTIFY           | BdTIFY       |
| PH01000038G0470 | PH01000115G0020 | LOC_Os03G08320.1 | Bradi1G72600 |
| PH01000038G0510 | PH01000115G0040 | LOC_Os03G08330.1 | Bradi1G72590 |
| PH01000114G0660 | PH01000836G0660 | LOC_Os02g05510.1 | Bradi1G33980 |
| PH01000213G1380 | PH01001078G0420 | LOC_Os10G25290.1 |              |
| PH01000008G2960 | PH01144128G0010 | LOC_Os08G33160.1 | Bradi3G36380 |
| PH01000360G1030 | PH01000158G0210 | LOC_Os07G42370.1 | Bradi3G10820 |
| PH01001584G0350 |                 | LOC_Os03G47970.1 | Bradi1G12330 |
| PH01001852G0020 |                 | LOC_Os03G08310.1 | Bradi1G72610 |
| PH01000750G0690 |                 | LOC_Os03G52450.1 | Bradi1G09550 |
| PH01000310G0500 |                 | LOC_Os03G28940.1 |              |
| PH01000213G1410 |                 | LOC_Os10G25250.1 |              |
| PH01002950G0020 |                 | LOC_Os09g23660.1 | Bradi4G29830 |
| PH01000052G0540 |                 | LOC_Os09G26780.1 | Bradi4G31240 |
| PH01000597G0660 |                 | LOC_Os04G55920.1 | Bradi5G24410 |
